# Supplementary material for: RPTPε promotes M2-polarized macrophage migration through ROCK2 signaling and podosome formation
Source: Oxford University Press journal article supplement (doi:10.1242/jcs.234641), 2019-11-13
Supplement: jcs234641supp.pdf [file jcs234641supp.pdf]

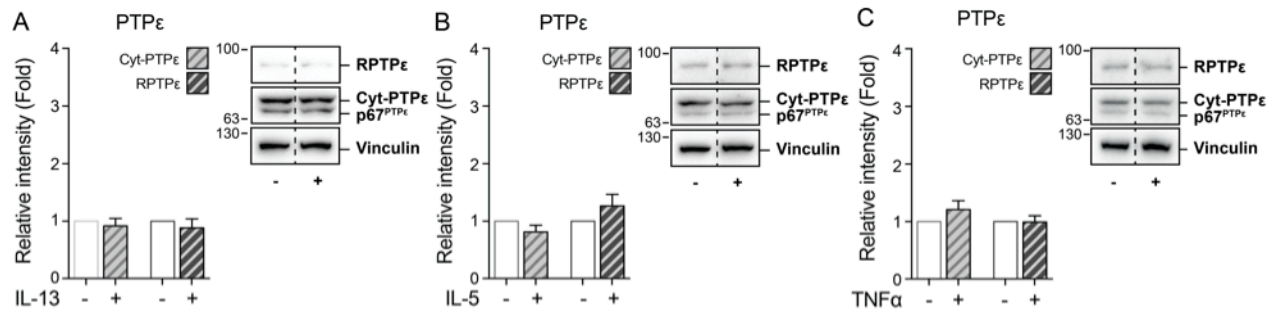

**Figure S1.** Effect of Th1 and Th2 cytokines on PTP $\epsilon$  isoform expression. Human primary monocytes were stimulated with (A) IL-13 (20 ng/mL), (B) IL-5 (15 ng/mL), and (C) TNF $\alpha$  (10 ng/mL), for 24 hours. Cyt-PTP $\epsilon$  and RPTP $\epsilon$  protein expression was analyzed by western blot densitometry and expressed as relative intensity corrected for vinculin expression. Representative western blots are shown and the dotted lines indicate that the image of the membrane has been modified to remove lanes irrelevant to the result (A: n = 7, B: n = 7, C: n = 6). Data are expressed as mean  $\pm$  s.e.m.

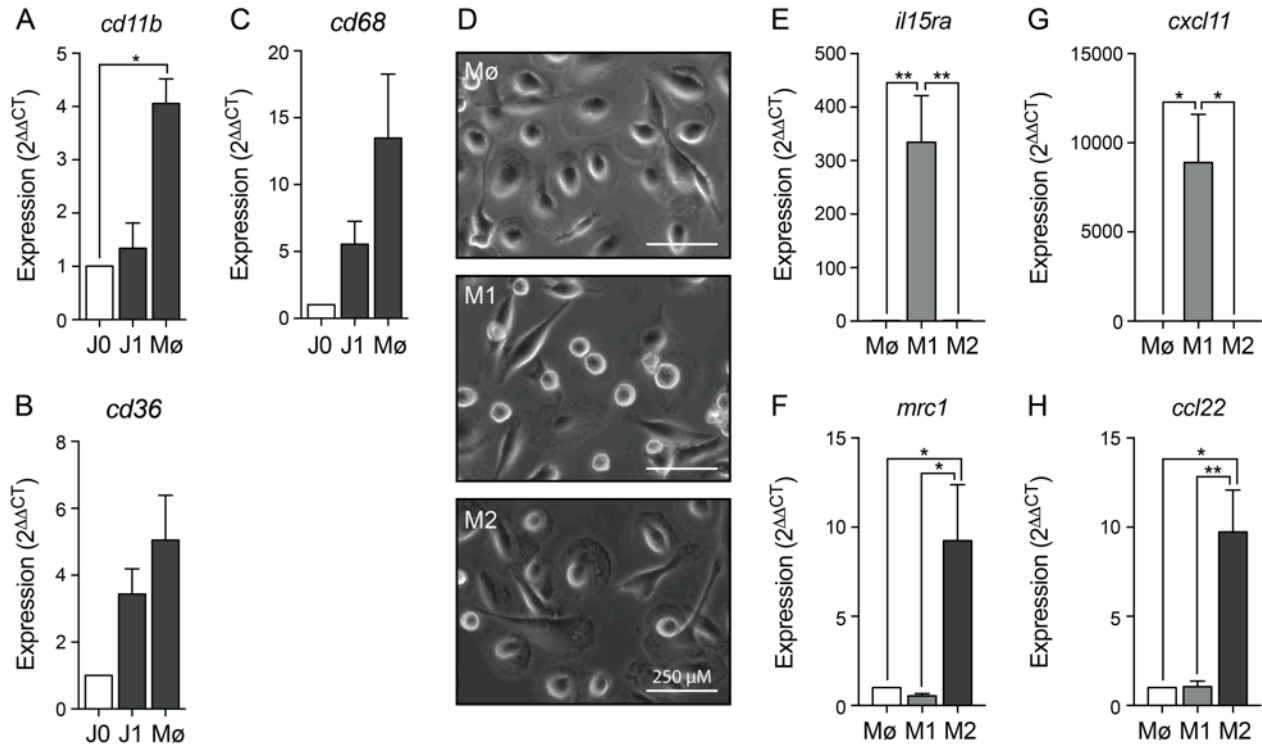

**Figure S2.** Characterisation of hMDMs. Human primary monocytes were differentiated according to the described protocol and mRNA expression of differentiation markers was analyzed by RT-qPCR and expressed as  $2^{\Delta\Delta CT}$  over RPL13A mRNA expression ((A) *CD11b*, n = 3; (B) *CD36*, n = 3; (C) *CD68*, n = 3). hMDMs were differentiated and polarized, as described in the experimental procedures section. For the resulting M0, M1- and M2- polarized hMDMs, (D) photographs of representative hMDMs were taken with a Leica DM-IRBE inverted microscope and (E-H) differentiation marker mRNA expression was analyzed by RT-qPCR and expressed as  $2^{\Delta\Delta CT}$  over RPL13A mRNA expression (n = 10- 11). The following primers were used:

*cd11b*\_forward 5'-GCTGCCGCCATCATCTTAC-3'  
*cd11b*\_reverse 5'-CCACATGCCAGTGTCTCTGC-3'  
*cd36*\_forward 5'-AGTTCTCAATCTGGCTGTGG-3'  
*cd36*\_reverse 5'-CGGAACCAAACCTCAAAAATG-3'  
*cd68*\_forward 5'-CTAGCTGGACTTTGGGTGAGG-3'  
*cd68*\_reverse 5'-TCTCTGTAACCGTGGGTGTC-3'  
*il15ra*\_forward 5'-AGACAACAGCCAAGAACTGG-3',  
*il15ra*\_reverse 5'-TTGCCTTGACTTGAGGTAGC-3',  
*mrc1*\_forward 5'-GATAAACCTGGGCCATGAG-3',  
*mrc1*\_reverse 5'-TTCTGTGATTCGGCATCCTG-3',

cxcl11\_forward 5'-TGGGGTAAAAGCAGTGAAAG-3',

cxcl11\_reverse 5'-TATAAGCCTTGCTTGCTTCG-3',

ccl22\_forward 5'-TGATTACGTCCGTTACCGTC-3',

ccl22\_reverse 5'-CCTGAAGGTTAGCAACACCAC-3'.

Data are expressed as mean  $\pm$  SEM. \* =  $p < 0.05$ , \*\* =  $p < 0.005$  by one-way Anova with Tukey's multiple comparisons post-test.

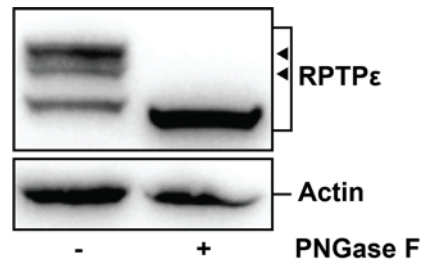

**Figure S3.** *RPTPε* presents multiple glycosylated forms. HEK-LT1 cells were transiently transfected with RPTPε. Forty-eight hours post-transfection, cells were lysed and 80 μg of cell lysate was treated with PNGase F using the Glycoprofile™ II, Enzymatic In-Solution N-Deglycosylation Kit (PP0201, Sigma-Aldrich®); 5 enzymatic units for 1 hour at 37 °C. Western Blot illustrates RPTPε glycosylated forms. Arrows indicate glycosylated protein.

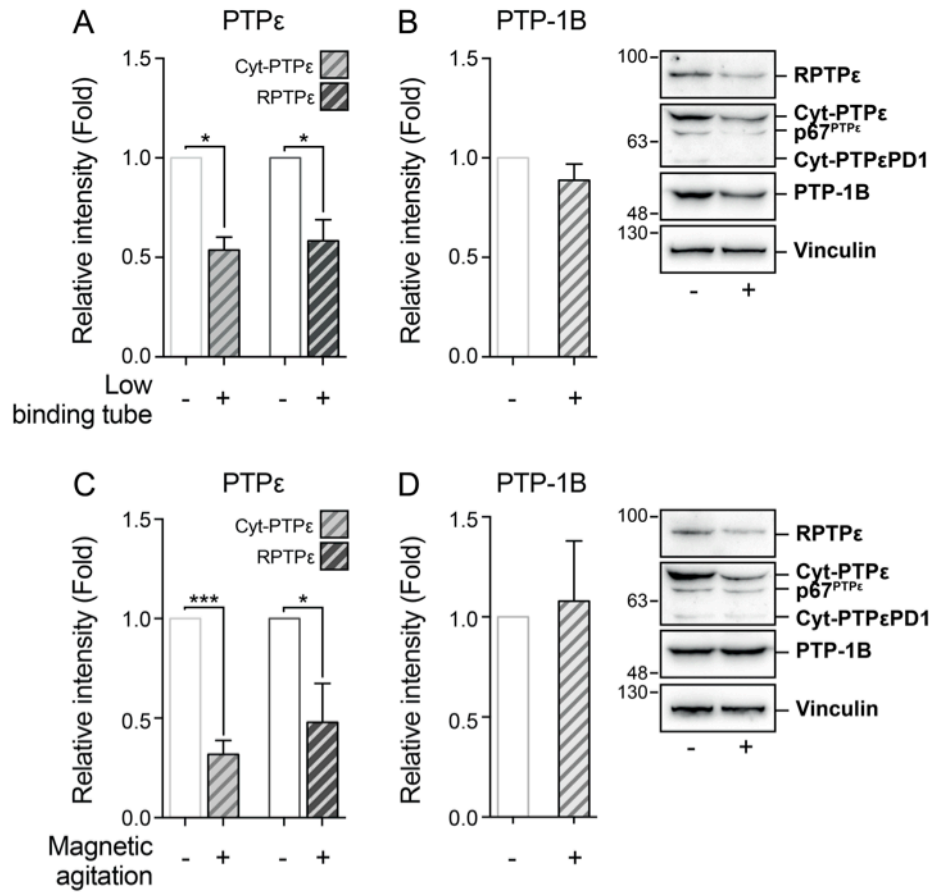

**Figure S4.** *Inhibition of adhesion prevents upregulation of PTP $\epsilon$  expression.* Human primary monocytes were incubated overnight either in (A – B) low-binding plastic tubes (n = 3) or with (C – D) constant agitation (n = 5). Expression of cyt-PTP $\epsilon$  and RPTP $\epsilon$  as well as of PTP-1B was then analyzed by western blot densitometry and expressed as relative intensity corrected for vinculin expression. Representative western blots are shown. Data are expressed as mean  $\pm$  SEM. \* = p < 0.05, \*\*\* = p < 0.001, by paired Student's t test.

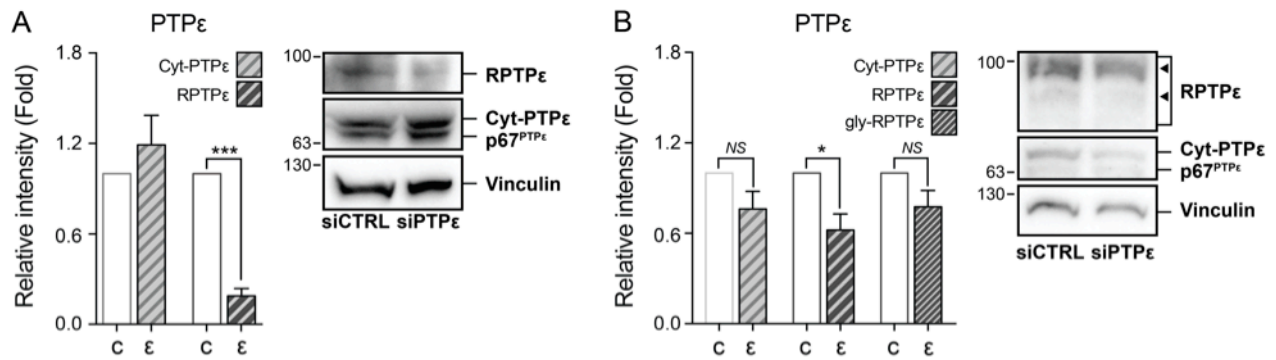

**Figure S5.** Downregulation of RPTP $\epsilon$  expression in human primary monocytes and M2- polarized hMDMs with siRNAs. (A) Following a 48-hour incubation after siRNA (siCTRL: c, or siPTP $\epsilon$ :  $\epsilon$ ) transfection in human primary monocytes (n = 4) or (B) following the transfection of siRNAs on days 5th and 7th – 3 hours before polarization – in M2-polarized hMDMs (n = 5), PTP $\epsilon$  isoform expression was analyzed by western blot densitometry and expressed as relative intensity over vinculin expression. Representative western blots are shown. Data are expressed as mean  $\pm$  SEM. \* = p < 0.05, \*\*\* = p < 0.001, by paired Student's t test. Arrows indicate glycosylated protein.

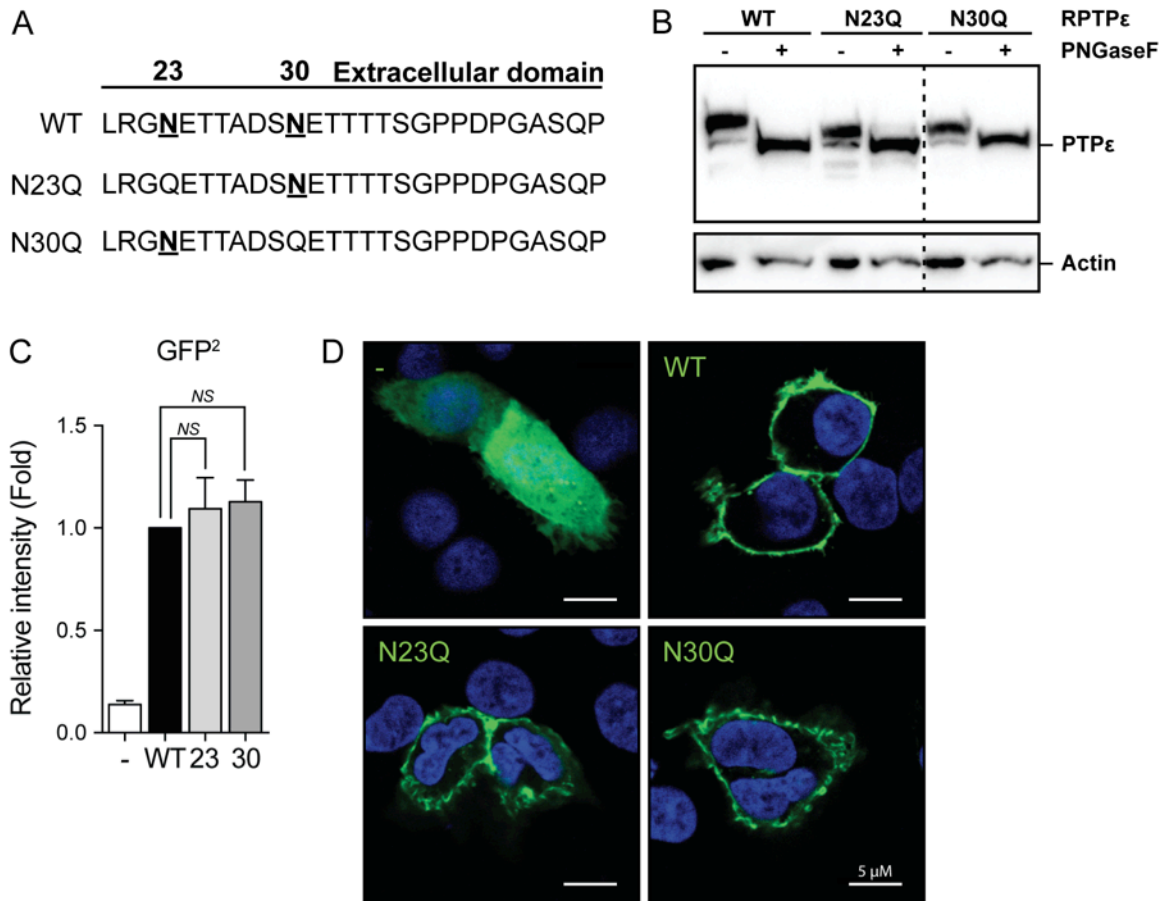

**Figure S6.** Mutation of the asparagine extracellular residues of RPTP $\epsilon$  decreases its glycosylation but does not affect the cellular localization and expression of the phosphatase in HEK-LT1. (A) The first (N23) and second (N30) extracellular asparagine residues of RPTP $\epsilon$  were mutated to glutamine (N23Q, N30Q), as described in the experimental protocol section, (B) decreasing their glycosylation levels as determined by western blot. A PNGaseF treatment further decreased the levels of residual glycosylation from the remaining residue. The dotted line indicates cropping within the same membrane. (C) cDNA constructs were expressed at the same levels, as shown by FACS, and (D) reached the cell membrane, as determined by laser scanning confocal microscopy. Representative images are shown.
